# Supplementary material for: Assessment of Harbour Porpoise Bycatch along the Portuguese and Galician Coast: Insights from Strandings over Two Decades
Source: MDPI journal article supplement (doi:10.3390/ani13162632), 2023-08-15
Supplement: s1 [file s1]

## Supplementary material

**Table S1.** Parameters used for the determination of bycatch assessment of harbour porpoises in Portugal, based on stranding data

| Variable                  | Definition                                          | Formula                                                                 |
|---------------------------|-----------------------------------------------------|-------------------------------------------------------------------------|
| $N_{\text{bycatch}}$      | Number of stranded animals with evidence of bycatch |                                                                         |
| EAM                       | Estimated annual mortality                          | $EAM = Abundance \times Mortality \text{ rate}$                         |
| CDR                       | Carcass detection rates                             | $CDR (\%) = \frac{\text{Number of strandings}}{EAM}$                    |
| $EAM_{\text{bycatch}}$    | Estimated annual mortality due to bycatch           | $EAM_{\text{bycatch}} = \frac{N_{\text{bycatch}}}{CDR}$                 |
| $APR_{\text{strandings}}$ | Annual population removal based on strandings data  | $APR_{\text{strandings}} (\%) = \frac{EAM_{\text{bycatch}}}{Abundance}$ |

**Table S2.** Minimum harbour porpoise annual mortality from bycatch ( $EAM_{bycatch}$ ) and annual population removal due to bycatch (APR, %) estimated from stranded individuals in the Portuguese coast between 2011 and 2015. Total strandings, number of harbour porpoise strandings in Portugal, including porpoises not evaluated for bycatch; number of porpoises evaluated for bycatch evidence is shown in brackets).  $N_{bycatch}$ , number of porpoise strandings resulting from bycatch. EAM, Estimated Annual Mortality using Mortality rate ( $Mr=0.18$ ) [33] and Population estimate ( $N$ ) for the period 2011-2015 [43]. Confidence intervals (CIs) are presented in brackets.

| Period    | Total strandings | $N_{bycatch}$ | Estimated Annual Mortality (EAM) | Carcass detection rate (CDR) | Estimated Annual Mortality from bycatch ( $EAM_{bycatch}$ ) | Annual Population Removal (APR) |
|-----------|------------------|---------------|----------------------------------|------------------------------|-------------------------------------------------------------|---------------------------------|
|           |                  |               | $Mr \times N$                    | Total strandings/ EAM (%)    | $N_{bycatch} / CDR$                                         | $EAM_{bycatch} / N$ (%)         |
| 2011      | 38 (24)          | 10            | 215<br>(82-564)                  | 17.65<br>(6.73-46.30)        | 57<br>(28-193)                                              | 4.74<br>(1.25-8.56)             |
| 2012      | 22 (15)          | 6             | 539<br>(273-1065)                | 4.08<br>(2.07-8.06)          | 147<br>(74-290)                                             | 4.91<br>(3.30-12.89)            |
| 2013      | 26 (18)          | 10            | 577<br>(276-1209)                | 4.50<br>(2.15-9.43)          | 222<br>(106-465)                                            | 6.92<br>(4.70-20.63)            |
| 2014      | 50 (26)          | 12            | 298<br>(129-686)                 | 16.80<br>(7.29-38.14)        | 71<br>(34-178)                                              | 4.32<br>(1.49-7.91)             |
| 2015      | 23 (13)          | 11            | 386<br>(166-899)                 | 5.95<br>(2.56-13.84)         | 185<br>(94-508)                                             | 8.61<br>(4.17-22.56)            |
| 2011-2015 | Mean: 32 (19)    | Mean: 10      | 406<br>(232-711)                 | 7.84<br>(4.47-13.73)         | 125<br>(71-219)                                             | 5.55<br>(3.17-9.72)             |
